# Supplementary material for: Cyanobacteria-based double-mediated photo-microbial electrochemical cells are promising future energy sources for electricity generation and hydrogen production
Source: Royal Society of Chemistry journal article supplement (doi:10.1039/d3ta02915h), 2023-01-01
Supplement: d3ta02915h1.pdf [file d3ta02915h1.pdf]

# Journal of Materials Chemistry A

Electronic Supplementary Information

## **Cyanobacteria-based double-mediated photo-microbial electrochemical cells are promising future energy sources for electricity generation and hydrogen production**

Youngrok Lee,<sup>‡a</sup> Jinhwan Lee,<sup>‡b</sup> and Sunghyun Kim<sup>\*a</sup>

<sup>a</sup> Department of Systems Biotechnology, Konkuk Institute of Science and Technology, Konkuk University, 120 Neudong-ro, Gwangjin-gu, Seoul 05029, Korea

<sup>b</sup> A&M Co. Lt. C-216, 01 Jinju-daero, Jinju-si, Gyeongsangnam-do 52828, Korea

\* Corresponding author

Email: skim100@konkuk.ac.kr

Tel: +82(0)2 450 3378

## Supplementary figures

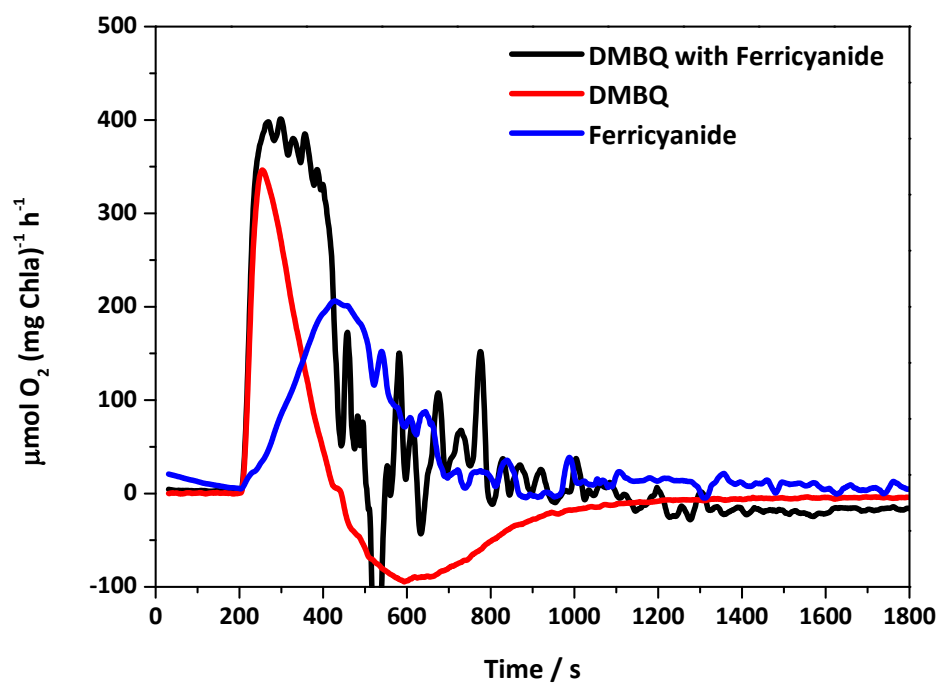

**Figure S1.** Comparison of oxygen evolution rates from *A. variabilis* depending on single and double mediator. The solution contained 1X BG11 medium and 50 mM HEPES buffer (pH 7.5) and was stirred at 750 rpm. Temperature = 28 °C.

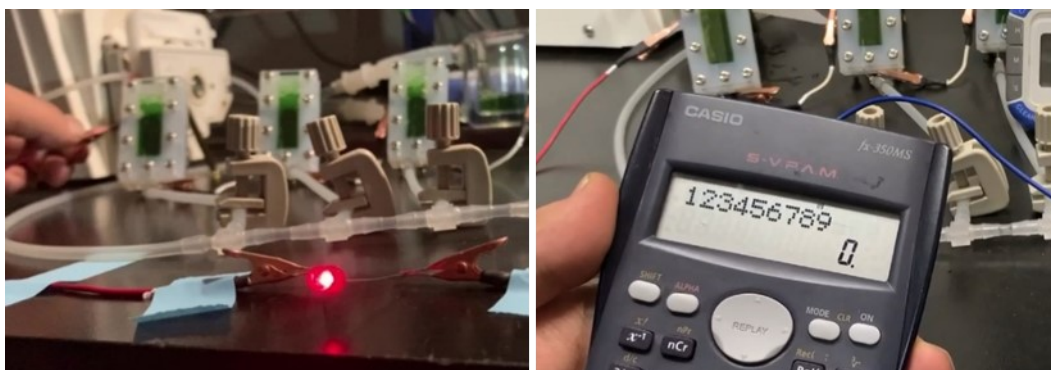

**Figure S2.** Lighting an LED and operating an electronic calculator using five series-connected DM-PMECs.

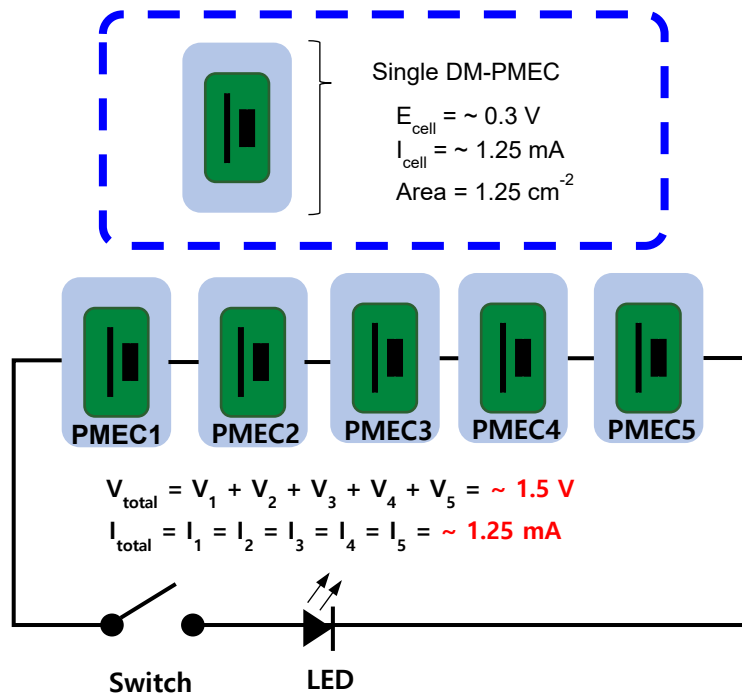

**Figure S3.** Series connection of five DM-PMECs for lighting a light-emitting diode.

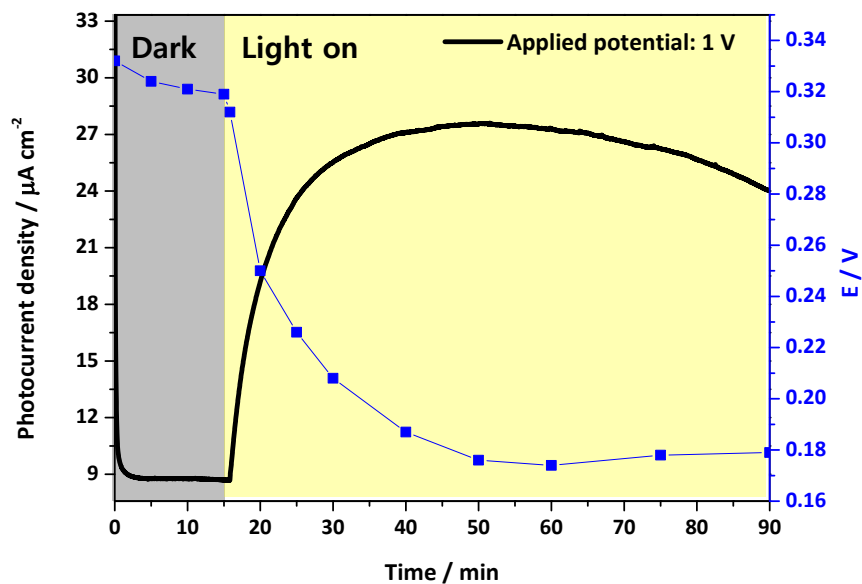

**Figure S4.** Photocurrent and anode potential change with time in a DM-PMEC operated in a two-electrode system when external voltage of 1 V was applied. Anodic chamber (12 mL) and cathodic chamber (14 mL) were separated by a Nafion membrane. Anolyte composition: 30  $\mu\text{g Chla mL}^{-1}$  of *A. variabilis*, 2 mM DMBQ, and 15 mM ferricyanide in 100 mM HEPES buffer (pH 7.5). Anode area: 32  $\text{cm}^2$ . Cathode area: 4.85  $\text{cm}^2$ . Light source: LED lamp (model: PS102, LANICS. CO. Ltd). Light intensity:  $\sim 719.3 \mu\text{mol s}^{-1} \text{m}^{-2}$  (ca. 35.9  $\text{mW cm}^{-2}$ ). The anolyte was purged by high-purity argon gas. The anode potential was measured by an Ag/AgCl electrode.

### Calculation of total input energy ( $W_{in}$ )

$W_{in}$  is calculated from the photocurrent density vs. time curve as follows.

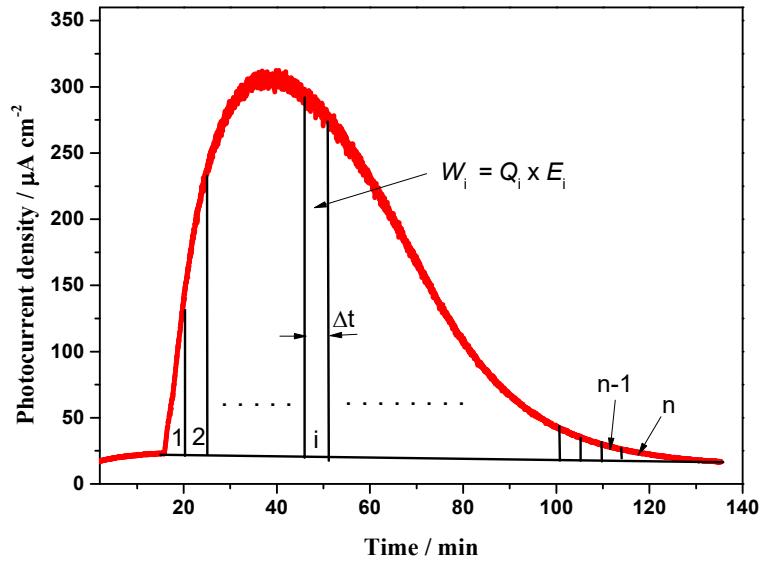

**Figure S5.** The curve is divided into  $n$  sections with an equal time interval  $\Delta t$ . The area of each section represents charge  $Q_i$ . Energy is given by  $Q_i \times E_i$  where  $E_i$  is the potential measured for each section. It is assumed that  $E_i$  is constant in the time interval  $\Delta t$ . Total input energy ( $W_{in}$ ) is then the sum of the energy at each section.

$$W_{in} = \sum_{i=1}^n W_i = \sum_{i=1}^n Q_i E_i$$

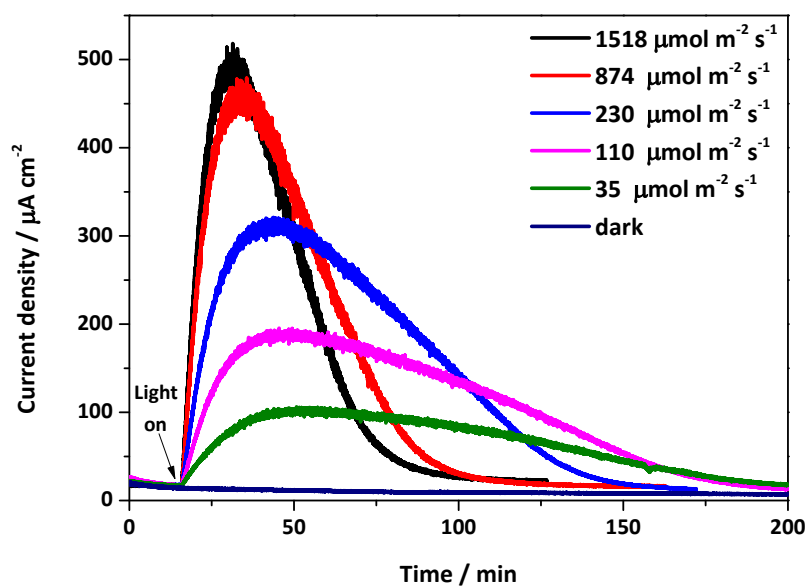

**Figure S6.** Photocurrent dependence on the light intensity in a DM-PMEC containing *A. variabilis* ( $30 \text{ mg Chla mL}^{-1}$ ). Current was measured in a chronoamperometric mode at  $0.4 \text{ V}$  vs.  $\text{Ag/AgCl}$ . Electrode area =  $16.6 \text{ cm}^2$ .

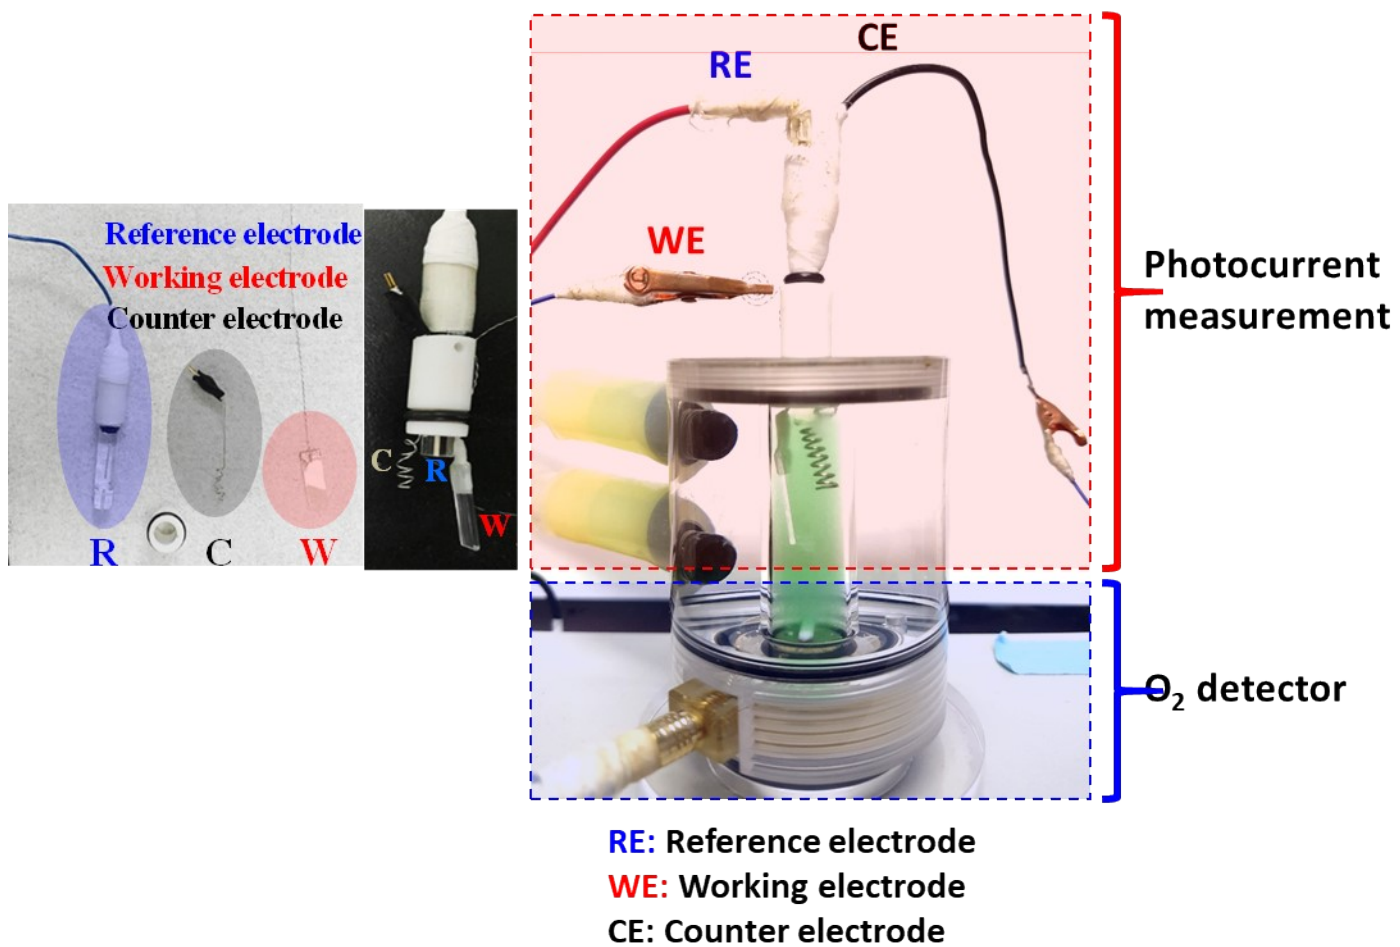

**Figure S7.** The dual-functioning electrochemical cell that measures oxygen evolution and photocurrent simultaneously. Light illuminates the cell from the top.
